# Supplementary material for: Recovery of deep-sea meiofauna community in Kaikōura Canyon following an earthquake-triggered turbidity flow
Source: PeerJ. 2024 Jun 25;12:e17367. doi: 10.7717/peerj.17367 (PMC11636979; doi:10.7717/peerj.17367)
Supplement: Supplemental Information 1 — The file includes four data sheets. The first sheet includes overall notes. The second sheet is the abundances (standardised to ind. per cm2) of meiofauna from the 0–5 cm section of each site for each time point. Sample name is a combination of site name and voyage name. The third sheet is the abundances of nematode species from the 0–5 cm section from two site at all time points. The fourth sheet is the environmental characteristics for the 0–5 cm section of each site from all time points. [file peerj-12-17367-s001.xlsx]

## Sheet: Notes
Notes:
Meiofauna abundance in ind./10 cm^2
Sampling time and site columns refer to the order of sampling and site for each core, 1a = 2006, 1 = 2010, 2 = Feb 2017, 3 = Sept 2017, and 4 = 2020
Environmental data table (same as the one in the thesis) is the same as the macrofauna environmental data

## Sheet: Meiofauna abundances
Samples	Nematoda	Copepoda	Nauplii	Kinorhyncha	Annelida	Amphipoda	Aplacophora	Gastrotricha	Bivalvia	Ostracoda	Tanaidacea	Priapulida	Isopoda	Halacaridae	Cumacean	Loricifera	Gromid	Gastropod	Sipuncalid	Scaphopod		Sampling time	Site
TAN2011K7	1405.09	84.7575	28.2525	1.8835	20.7185	1.8835	0	0	5.6505	0	0	0	0	0	0	0	1.8835	0	0	0		4	K7
TAN1708K6	452.04	39.5535	33.903	0	11.301	0	0	0	0	0	0	0	0	0	0	0	1.8835	1.8835	0	0		3	K6
TAN2011K6	2260.2	13.1845	24.4855	1.8835	60.272	0	0	0	1.8835	1.8835	0	0	0	0	0	0	24.4855	0	0	0		4	K6
TAN2011K13	2039.83	139.379	220.369	3.767	20.7185	1.8835	0	0	0	0	0	0	0	0	0	0	3.767	0	1.8835	0		4	K13
TAN1708K7	288.175	13.1845	5.6505	3.767	1.8835	0	0	0	0	0	0	0	0	0	0	0	1.8835	0	0	0		3	K7
TAN1708K13	340.913	79.107	13.1845	0	35.7865	0	0	0	13.1845	0	0	0	0	0	0	0	0	0	1.8835	0		3	K13
TAN1708K3	133.728	0	0	0	1.8835	0	0	0	0	0	0	0	0	0	0	0	0	0	0	0		3	K3
TAN2011K3	3448.69	11.301	7.534	7.534	16.9515	1.8835	1.8835	0	0	0	0	0	0	0	0	0	1.8835	0	1.8835	0		4	K3
TAN2011K2	2250.78	128.078	73.4565	35.7865	47.0875	0	0	50.8545	3.767	0	0	0	0	0	0	0	5.6505	0	0	0		4	K2
TAN1708K2	1290.2	16.9515	5.6505	0	9.4175	0	0	1.8835	0	0	0	0	1.8835	0	0	0	0	0	0	0		3	K2
TAN1708K4	28.2525	0	1.8835	0	1.8835	0	0	0	0	0	0	0	0	0	0	0	0	0	0	0		3	K4
TAN2011K4	1762.96	60.272	69.6895	16.9515	13.1845	0	0	0	1.8835	0	0	0	0	0	0	0	1.8835	0	0	0		4	K4
TAN1708K1	828.74	5.6505	0	0	3.767	0	0	0	0	0	0	0	0	0	0	0	0	0	0	0		3	K1
TAN1708K5	226.02	9.4175	0	1.8835	3.767	0	0	0	0	0	0	0	0	0	0	0	0	0	0	0		3	K5
TAN2011K1	1341.05	11.301	30.136	3.767	16.9515	0	0	3.767	0	0	0	0	0	0	0	0	0	0	0	0		4	K1
TAN2011K5	2047.36	79.107	84.7575	9.4175	16.9515	0	0	3.767	0	0	0	0	0	0	0	0	0	0	0	0		4	K5
TAN1701K2	113.952	6.59225	0	0.94175	3.767	0	0	0	0	0	0	0	0	0	0	0	0	0	0	0		2	K2
TAN1701K3	206.243	27.3107	8.47575	4.70875	6.59225	0	0	0	0	0	0	0	0	0	0	0	0	0	0	0		2	K3
TAN0616K5	2967.45	77.2235	71.573	70.6312	16.0098	0.94175	0	16.9515	14.1263	0	0	0	0	0	0	0	0	0	23.5437	0		1a	K5
TAN0616K4	2066.2	156.331	142.204	125.253	41.437	0.94175	0	61.2137	20.7185	0	0	0	0	0	0	0	0	0	8.47575	0.94175		1a	K4
TAN1006K1	3075.02	5.645	5.65	16.01	32.975	0	0.945	0.94	0	0	0	0	0	0	0	0	0	0	0	0		1	K1
TAN1006K2	1713.46	3.7635	1.8835	3.76175	20.701	0	0	0	0	0	0	0.94175	0	1.88175	0	0	0	0	0	0		1	K2
TAN1006K3	1933.99	16.0045	28.2455	22.5652	47.0647	0	0	0	0.94	0	0	0	0	0	0	0	0	0	0	0		1	K3
TAN1006K4	2844.34	27.29	18.875	35.765	13.18	0	0	8.495	0.94	0.94	0	0	0.945	0	0	0.94	0	0	0	0		1	K4
TAN1006K5	2256.49	31.9932	19.7697	20.68	12.2287	0.94	0	0	0.94	1.88	0	1.8835	0	0.94175	0	0	0	0	0	0		1	K5
TAN1006K6	2643.92	22.5892	6.27833	56.4537	49.136	0.626667	3.13567	1.25567	0	1.88117	0	0	0	0.626667	0	0	0	0	0	0		1	K6
TAN1006K7	2370.17	11.314	6.5955	21.6765	45.2657	0	1.88675	0	0	0	0	0	0	0	0	0	0	0	0	0		1	K7
TAN1006K13	1323.98	150.84	288.639	172.698	58.3725	3.14333	0	0	5.0215	0.627833	0.627833	4.40117	0	0	0.626667	0	0	0	0	0		1	K13

## Sheet: Nematode abundances
	K2_2	K3_2	TAN1701_181 #1	TAN1701_181 #2	TAN1701_182 #1	TAN1701_182 #2	TAN1708_12	TAN1708_6	TAN2011_35	TAN2011_38
Aegialoalaimus_3	14.4	0	1.514	0	1.514	0	0	0	0	0
Amphimonhystrella_4			0	3.028	1.514	0	0	0	0	0
Campylaimus_6	144	59.01	0	1.514	0	0	0	0	0	30.154
Cephalanticoma_A			0	0	0	1.514	0	0	0	0
Cervonema_kaikouraensis	158.4	98.35	1.514	1.514	3.028	1.514	0	9.26	44.354	60.308
Choniolaimus_2	14.4	0
Chromadora_1			0	1.514	0	0	0	0	22.177	45.231
Chromadorita_1			0	0	0	0	0	0	0	15.077
Comesomatidae_3			0	0	0	1.514	0	0	0	0
Comesomatidae_6			0	0	0	0	0	0	110.885	0
Cricolaimus_A			0	0	0	1.514	0	0	0	0
Cyartonema_1	14.4	0
Daptonema_18	43.2	137.69	13.626	9.084	59.046	13.626	10.598	777.84	1552.39	588.003
Daptonema_21	28.8	19.67	0	0	3.028	0	3.028	46.3	44.354	45.231
Daptonema_23	0	118.02	0	4.542	25.738	1.514	0	0	0	60.308
Daptonema_25			0	1.514	7.57	0	0	0	0	0
Daptonema_26	14.4	39.34	0	1.514	6.056	0	1.514	0	0	0
Daptonema_27			0	0	1.514	0	0	37.04	0	0
Daptonema_D			0	0	0	0	0	18.52	0	0
Desmodora_4			0	0	0	1.514	0	0	0	0
Desmolaimus_3			0	0	0	0	0	0	0	30.154
Desmolorenzenia_B			1.514	0	0	0	0	0	0	0
Dichromadora_7	14.4	19.67	0	3.028	3.028	0	1.514	0	22.177	75.385
Eleutherolaimus_2			1.514	0	0	0	0	0	0	75.385
Endeolophos_3	129.6	0	0	0	1.514	0	1.514	27.78	44.354	180.924
Halalaimus_2			0	0	1.514	0	0	0	0	0
Halalaimus_21	0	19.67	0	0	1.514	0	0	0	0	15.077
Halalaimus_3	0	19.67
Halalaimus_6			0	0	0	1.514	0	0	0	15.077
Halalaimus_A			1.514	0	0	0	0	0	0	0
Halalaimus_B			0	0	0	1.514	0	0	0	15.077
Hopperia _beaglense	144	216.37	3.028	0	0	0	0	9.26	44.354	105.539
Laimella_3	28.8	0	0	1.514	1.514	0	0	0	0	0
Leptolaimina_5	0	39.34
Leptolaimus_14	100.8	59.01	0	0	1.514	0	0	0	0	0
Linhomoeidae_21			1.514	0	3.028	0	0	0	0	0
Linhomoeidae_E			0	0	0	0	1.514	0	0	0
Linhomoeus_1	0	19.67
Linhomoeus_A			1.514	0	3.028	0	1.514	0	0	15.077
Linhystera_6	14.4	0
Marylynnia_A			0	0	0	1.514	0	0	0	0
Metacyatholaimus_1	43.2	0	1.514	4.542	12.112	1.514	0	0	0	0
Metacyatholaimus_a			0	0	1.514	0	0	0	0	0
Metadasynemella_7	0	19.67
Metalinhomoeus_1	43.2	59.01	0	0	4.542	3.028	3.028	0	22.177	0
Metalinhomoeus_2			0	0	1.514	0	0	0	0	0
Metalinhomoeus_B			0	0	0	0	0	0	0	15.077
Microlaimus_34	532.8	0	0	1.514	3.028	4.542	4.542	0	66.531	75.385
Molgolaimus_8	100.8	0	0	0	0	3.028	0	0	0	0
Molgolaimus_9			0	1.514	0	0	0	0	0	0
Monhysteridae_35	14.4	19.67	1.514	1.514	1.514	1.514	0	9.26	0	0
Monhysteridae_A			0	1.514	0	0	0	0	0	0
Oncholaimus_A			0	0	0	0	4.542	0	0	0
Oxystominidae_6			0	1.514	1.514	1.514	0	0	0	45.231
Paracanthonchus_2	14.4	0	0	0	3.028	1.514	4.542	0	0	0
Paralongicyatholaimus_6			0	1.514	1.514	1.514	0	0	0	0
Paramesonchium_2			0	0	0	0	1.514	9.26	0	0
Paramonohystera_1			0	4.542	10.598	1.514	0	0	0	0
Paramonohystera_2			1.514	0	0	0	0	0	22.177	0
Parodontophora_2	0	59.01	0	0	0	0	0	0	22.177	0
Phanodermopsis_5			0	0	0	0	1.514	0	22.177	0
Retrotheristus_5	28.8	98.35	3.028	0	4.542	0	0	18.52	0	30.154
Sabatieria_11	0	39.34	0	0	1.514	4.542	7.57	0	22.177	0
Sabatieria_12	43.2	177.03	1.514	0	0	3.028	7.57	9.26	110.885	0
Sabatieria_22	0	39.34
Sabatieria_26	14.4	0
Sabatieria_A	57.6	904.82	24.224	9.084	9.084	6.056	3.028	46.3	487.894	120.616
Setosabatieria_conicauda			0	0	1.514	0	0	0	0	0
Southerniella_1			0	0	0	0	0	0	0	60.308
Sphaerolaimus_1	43.2	78.68	1.514	0	1.514	0	0	0	0	15.077
Sphaerolaimus_11	0	19.67	0	0	0	1.514	0	0	0	0
Steineria_2	0	78.68
Terschellingia_3	28.8	0	1.514	0	3.028	1.514	1.514	0	0	0
Theristus_13	14.4	0	0	1.514	0	0	0	0	0	0
Trefusia_piperata			0	0	1.514	0	0	0	0	0
Vasostoma_hexodontium			1.514	1.514	1.514	1.514	0	0	22.177	0
Xyalidae_28			0	0	1.514	0	0	0	0	30.154

## Sheet: Environmental data
Time Point	Site	*Depth (m)	%Water	*%TOM	*Chl a (mg g-1 sediment)	Phaeo (mg g-1 sediment)	*Chl a : Phaeo	*C:N (molar)	*%N	%TOC	%CaCO3	Mean (µm)	D50 (µm)	Sorting (Folk and Ward, ɸ)	*Skewness (Folk and Ward, ɸ)	(D90/D10) (µm)	(D75/D25) (µm)	% Very Fine Sand	% Clay (<4 µm)	% <8 µm	*% <16 µm
6 years before	K13	404	-	3.59	0.3	3.2	0.08	7.84017	0.07	0.64	2.3	25.5696	13.7447	1.64845	-0.0446315	20.0286	5.43995	9.5117	13.5533	31.5955	54.2889
	K01	1017	46.3594	3.09	7.2	24.9	0.29	6.86015	0.11	0.88	1.8	23.3545	14.0075	1.61953	0.0607481	18.5947	4.53441	6.38915	14.6367	31.0552	53.9471
	K02	989	39.6025	2.11	4.3	17.6	0.25	6.25988	0.1	0.73	1.6	35.7573	18.3551	1.8859	0.0125143	30.536	6.59772	14.4988	12.5605	26.3609	45.1528
	K03	1032	47.0769	2.78	6.2	28.6	0.22	6.60289	0.1	0.77	4.9	26.3973	14.7918	1.70797	0.0210418	22.1832	5.0016	8.98806	14.0393	30.0433	51.8663
	K04	1061	43.9469	2.6	3.4	15.3	0.22	6.25988	0.1	0.73	2	26.6486	15.1547	1.71676	0.0349079	22.4952	5.17614	9.49174	14.0672	29.7217	51.017
	K05	1127	41.9247	2.19	4.5	14.2	0.32	6.75296	0.08	0.63	1.6	36.9642	20.9728	1.81653	0.0669633	26.4536	6.23408	15.6754	10.8741	23.4191	41.0875
	K06	1289	39.34	2	2.4	22.6	0.106195	8.1	0.1	0.81	-	27.65	15.28	1.73	0.001	23.01	6.54	13.3	14.2	31.1	50.6
	K07	1320	50.2527	3.56	9.4	36.2	0.26	6.33244	0.13	0.96	4.1	22.3242	14.3718	1.52558	0.092058	15.3407	4.20759	4.97539	13.3763	29.7818	53.1474
10 weeks after	K02	1186	53.8004	4.84819	1.71667	9.50667	0.180548	9.57935	0.111241	0.914583	3.94333	16.6877	10.4056	1.3826	-0.0574588	12.1199	3.75336	3.26507	15.1	38.3414	66.2297
	K03	1036	52.478	3.80396	3.84333	18.9033	0.192304	9.40342	0.104408	0.835464	4.26	20.4649	11.7451	1.50689	-0.0768732	14.7844	4.53251	5.94817	13.7	35.0426	60.2774
10 months after	K13	422	48.89	2.32	3.8	16.5	0.230303	5.83112	0.1	0.68	3.59214	23.498	12.5174	1.63695	-0.0739223	20.0775	5.17897	9.16454	14.9	34	57.6279
	K01	994	52.13	3.428	1.7	11.48	0.148084	6.55144	0.1	0.764	3.95305	17.2968	9.97981	1.48254	-0.0717076	14.3072	4.25155	3.80725	18.3893	40.8147	65.8986
	K02	1188	48.292	2.928	2.8	12.86	0.217729	5.4973	0.112	0.718	4.0887	25.85	13.6672	1.66332	-0.0482016	20.6523	5.77991	9.32131	14.2274	32.6987	54.235
	K03	1000	47.89	2.95	1.082	7.87	0.137484	8.66	0.1	0.866	-	18.95	10.48	1.56	-0.074	16.2	4.733	5.3	18.3	39.7	66.3
	K04	1069	57.606	3.508	5.24	31.22	0.167841	5.71168	0.112	0.746	4.71382	21.2827	11.6145	1.584	-0.0800571	17.4465	4.97648	7.04388	15.7412	36.2262	60.0852
	K05	1014	60.766	3.936	12.34	40.04	0.308192	5.43556	0.124	0.786	3.97744	24.8996	12.875	1.6641	-0.0733341	20.8642	5.7847	9.36807	14.9085	34.0904	56.1744
	K06	1230	58.302	3.82833	2.78	19.66	0.141404	5.76516	0.13	0.874	5.69139	16.4145	9.785	1.44778	-0.064266	13.6624	3.99925	3.53249	18.3	41.1583	67.2677
	K07	1298	57.56	4.06	1.74	17.72	0.0981941	5.73758	0.11	0.736	4.87571	19.0111	11.2189	1.47247	-0.0579011	14.1052	4.23585	4.4679	15.1824	36.569	62.2473
4 years after	K13	425	37.848	2.34	1.5	13.84	0.108382	6.12873	0.068	0.486	3.06057	29.5806	15.4394	1.76873	-0.0242829	25.2471	6.66724	14.3762	13.9978	30.5543	50.3587
	K01	1048	51.57	3.196	4.6	23.98	0.191827	5.95827	0.116	0.806	3.82551	19.0394	10.6454	1.51384	-0.103842	15.1267	4.28559	5.6892	15.9136	38.1539	63.8232
	K02	1190	48.016	3.215	2.28	20.22	0.11276	6.36278	0.1	0.742	4.24445	22.7705	11.9266	1.59491	-0.105747	17.9945	5.09279	7.85219	14.3934	35.1286	59.2354
	K03	1049	51.506	3.52	3.86	25.94	0.148805	6.12736	0.11	0.786	4.71445	19.7846	10.6891	1.53657	-0.116928	15.7859	4.33327	6.10458	15.8368	38.0769	63.5701
	K04	1068	51.954	3.712	3.22	25.72	0.125194	6.30089	0.092	0.676	4.60363	19.8238	10.7324	1.53849	-0.10839	15.9257	4.42395	5.83435	16.0685	38.1031	63.2993
	K05	1015	47.28	3.27	4.276	35.08	0.121893	7.8871	0.124	0.978	-	26.91	13.53	1.698	-0.074	21.88	5.875	10.1	13.9	32.5	54.5
	K06	1293	56.406	4.406	2.64	25.04	0.105431	6.7539	0.113	0.89	5.23908	18.3305	10.8147	1.41224	-0.0908081	12.8335	3.72412	4.36048	13.9403	36.7257	64.6617
	K07	1312	53.714	3.77	2.42	19.16	0.126305	6.59509	0.11	0.846	6.73538	17.1063	10.1641	1.42507	-0.0870878	13.2184	3.79018	3.91651	15.995	39.3328	66.4118
